# Supplementary material
Source: PubMed Central journal article supplement (PMC3006667)
Supplement: NIHMS232460-supplement-01.pdf [file NIHMS232460-supplement-01.pdf]

Supplemental Table. Age and age-adjusted percentages and average levels of concomitant risk factors and age-adjusted mortality across ranges of Hb in the 47 elderly men who developed PD in the Honolulu-Asia Aging Study.

|                                         | Hb range (g/dL) |             |             |
|-----------------------------------------|-----------------|-------------|-------------|
|                                         | <14             | 14-15.9     | ≥16         |
| Sample size                             | 5               | 24          | 18          |
| Age at the beginning of follow-up       | 77.2 ± 3.3*     | 76.4 ± 3.9  | 77.2 ± 4.2  |
| Mid-life cigarette smoking (pack-years) | 50.3 ± 37.9     | 23.4 ± 28.0 | 27.9 ± 31.1 |
| Mid-life coffee intake (oz/d)           | 16.1 ± 17.4     | 9.9 ± 8.1   | 10.5 ± 13.0 |
| % constipated (N)                       | 20.6 (1)        | 24.5 (6)    | 17.0 (3)    |
| % with excessive daytime sleepiness (N) | 19.9 (1)        | 18.6 (4)    | 20.6 (4)    |
| % with prevalent cancer (N)             | 0.0 (0)         | 8.3 (2)     | 11.2 (2)    |
| Total deaths/100 person-years (N)       | 6.2 (2)         | 2.7 (4)     | 1.7 (3)     |

\*Mean ± standard deviation

Note: There are no significant associations between Hb and the study characteristics in the above table.
